# Supplementary material
Source: ML conference proceedings conference paper supplement (https://openreview.net/forum?id=u8kFmPafOc)
Supplement: supplementary_material [file attachment]

## A Appendix

**An Example of Surrogate Loss for FNR** For our particular example involving minimizing  $f = \text{FNR} = \frac{\text{FN}}{\text{total positives}}$ , recall that  $\text{FN}(s_{\theta|\lambda}) = \sum_{i:y_i=1} \mathbb{1}(p_i(\theta) \leq \lambda)$  where  $p_i$  is the prediction for the  $i$ -th positive example. We replace the indicator function with its smooth surrogate and get  $\widetilde{\text{FN}}(s_{\theta|\lambda}) = \sum_{i:y_i=1} \sigma_{\tau}(-(p_i - \lambda))$ , where  $\sigma_{\tau}(u) = 1/(1 + \exp(-\tau u))$  denotes a temperature scaled sigmoid function. This gives us  $\tilde{f} = \frac{\widetilde{\text{FN}}}{\text{total positives}}$  as the surrogate loss.

**Implicit Function Theorem on  $\theta$**  Here we provide the statement for the implicit function theorem and its modification for the last layer weights:

**Theorem 1** (Implicit Function Theorem on  $\theta$  [10], informal). *For any  $(\theta_0, \lambda_0) \in U \subseteq \mathbb{R}^p \times \mathbb{R}^m$  pair that satisfies  $\tilde{g}(\theta_0, \lambda_0) = 0$ , if the determinant of the Jacobian matrix is nonzero, i.e.,  $\det[\frac{\partial \tilde{g}^i}{\partial \theta^j}(\theta_0, \lambda_0)] \neq 0$ , then there exists a neighborhood  $\Theta \times \Lambda$  of  $(\theta_0, \lambda_0)$  in  $U$  and a unique function  $\tilde{h} : \Theta \Rightarrow \Lambda$ :*

$$\tilde{g}(\theta, \lambda) = \mathbf{0} \Leftrightarrow \lambda = \tilde{h}(\theta). \quad (7)$$

**Theorem 2** (Implicit Function Theorem on  $\theta_L$ ). *For any  $(\theta_0, \lambda_0) \in U \subseteq \mathbb{R}^p \times \mathbb{R}^m$  pair that satisfies  $\tilde{g}(\theta_0, \lambda_0) = \mathbf{0}$ , if the determinant of the Jacobian matrix w.r.t  $\theta_L$  is nonzero, i.e.  $\det[\frac{\partial \tilde{g}^i}{\partial \theta_L^j}(\theta_0, \lambda_0)] \neq 0$ , then there exists a neighborhood  $\Theta \times \Lambda$  of  $(\theta_0, \lambda_0)$  in  $U$  and a unique function  $\tilde{h}_L : \Theta \Rightarrow \Lambda$  such that*

$$\tilde{g}(\theta, \lambda) = 0 \Leftrightarrow \lambda = \tilde{h}_L(\theta_L).$$

**Gradient Update Rule for Eq. (3)** To compute a local derivative for  $\tilde{f}(\theta, \tilde{h}(\theta))$  within the neighborhood of  $\theta_0$  using Theorem 1 we have the following update rule:

$$\nabla_{\theta} \tilde{f}(\theta, \tilde{h}(\theta)) = \nabla_{\theta} \tilde{f}(\theta, \lambda) + \frac{\partial \tilde{f}(\theta, \lambda)}{\partial \lambda} \nabla_{\theta} \tilde{h}(\theta) \quad (8)$$

We will further need the derivative of the implicit function  $\tilde{h}$  w.r.t.  $\theta$ , i.e.  $\nabla_{\theta} \tilde{h}(\theta)$ . Since  $\tilde{g}(\theta, \tilde{h}(\theta)) = \mathbf{0}$  in the neighborhood of  $\theta_0$ , we have:

$$\nabla_{\theta} \tilde{g}(\theta, \lambda) + \frac{\partial \tilde{g}(\theta, \lambda)}{\partial \lambda} \nabla_{\theta} \tilde{h}(\theta) = \mathbf{0} \Rightarrow \nabla_{\theta} \tilde{h}(\theta) = -\frac{\nabla_{\theta} \tilde{g}(\theta, \lambda)}{\frac{\partial \tilde{g}(\theta, \lambda)}{\partial \lambda}} \quad (9)$$

Plugging in Eq. (9) back to Eq. (8), we can get the final gradient for the model parameter  $\theta$ . See section 3.3 of [6] for a more detailed derivations for the update rule of  $\theta$  and  $\lambda$ .

**Gradient Update Rule for Eq. (4)** Furthermore, we can break the gradient of Eq. (4) into two parts: the gradient w.r.t  $\theta_L$ , thus obtaining the gradient w.r.t  $\theta_L$  and obtain the following gradients<sup>3</sup>:

$$\partial_{\theta_L} \tilde{f}(\theta, \lambda) = \nabla_{\theta_L} \tilde{r} \quad \text{and} \quad \partial_{\theta_L} \tilde{f}(\theta, \lambda) = \nabla_{\theta_L} \tilde{\ell} + \frac{\partial \tilde{\ell}}{\partial \lambda} \nabla_{\theta_L} \tilde{h}_L(\theta_L) \quad (10)$$

**Experimental Details** Following [6], we choose three binary attributes (i.e. High-cheekbones, Smiling and Wearing-lipsticks) as target attribute for our experiments, and train a binary classifier for each attribute. Similar to [6], we use a 6-layer neural network with 5 convolutionary layers with 128, 256, 512, 512 filters respectively, and we use ReLU as our activation functions and batch normalization layers in the networks. We do 5 random trails for each experiments and report the average values of the metric.

<sup>3</sup>When it is clear from the content, we use  $\tilde{\ell}$  to denote  $\tilde{\ell}(\theta_L|\theta_L, \lambda)$  to ease the notation, same applies for  $\tilde{r}$ ,  $\widetilde{\text{FPR}}$ , and  $\widetilde{\text{FNR}}$ .
